# Supplementary material for: Testing Strategies of the In Vitro Micronucleus Assay for the Genotoxicity Assessment of Nanomaterials in BEAS-2B Cells
Source: MDPI journal article supplement (doi:10.3390/nano11081929), 2021-07-27
Supplement: s1 [file s1]

# Supplementary Materials

## Testing Strategies of the In Vitro Micronucleus Assay for the Genotoxicity Assessment of Nanomaterials in BEAS-2B Cells

Tereza Cervena <sup>1,2,†</sup>, Andrea Rossnerova <sup>3,†</sup>, Tana Zavodna <sup>3</sup>, Jitka Sikorova <sup>3</sup>, Kristyna Vrbova <sup>1</sup>, Alena Milcova <sup>3</sup>, Jan Topinka <sup>3</sup> and Pavel Rossner, Jr. <sup>1,\*</sup>

<sup>1</sup> Department of Nanotoxicology and Molecular Epidemiology, Institute of Experimental Medicine CAS, Videnska 1083, 142 20 Prague 4, Czech Republic; tereza.cervena@iem.cas.cz (T.C.); kristyna.vrbova@iem.cas.cz (K.V.)

<sup>2</sup> Department of Physiology, Faculty of Science, Charles University, 128 44 Prague 2, Czech Republic

<sup>3</sup> Department of Genetic Toxicology and Epigenetics, Institute of Experimental Medicine CAS, Videnska 1083, 142 20 Prague 4, Czech Republic; andrea.rossnerova@iem.cas.cz (A.R.); tana.zavodna@iem.cas.cz (T.Z.); jitka.sikorova@iem.cas.cz (J.S.); alena.milcova@iem.cas.cz (A.M.); jan.topinka@iem.cas.cz (J.T.)

\* Correspondence: pavel.rossner@iem.cas.cz; Tel.: +420-241-062-763; Fax: +420-241-062-785

† These authors contributed equally to this work.

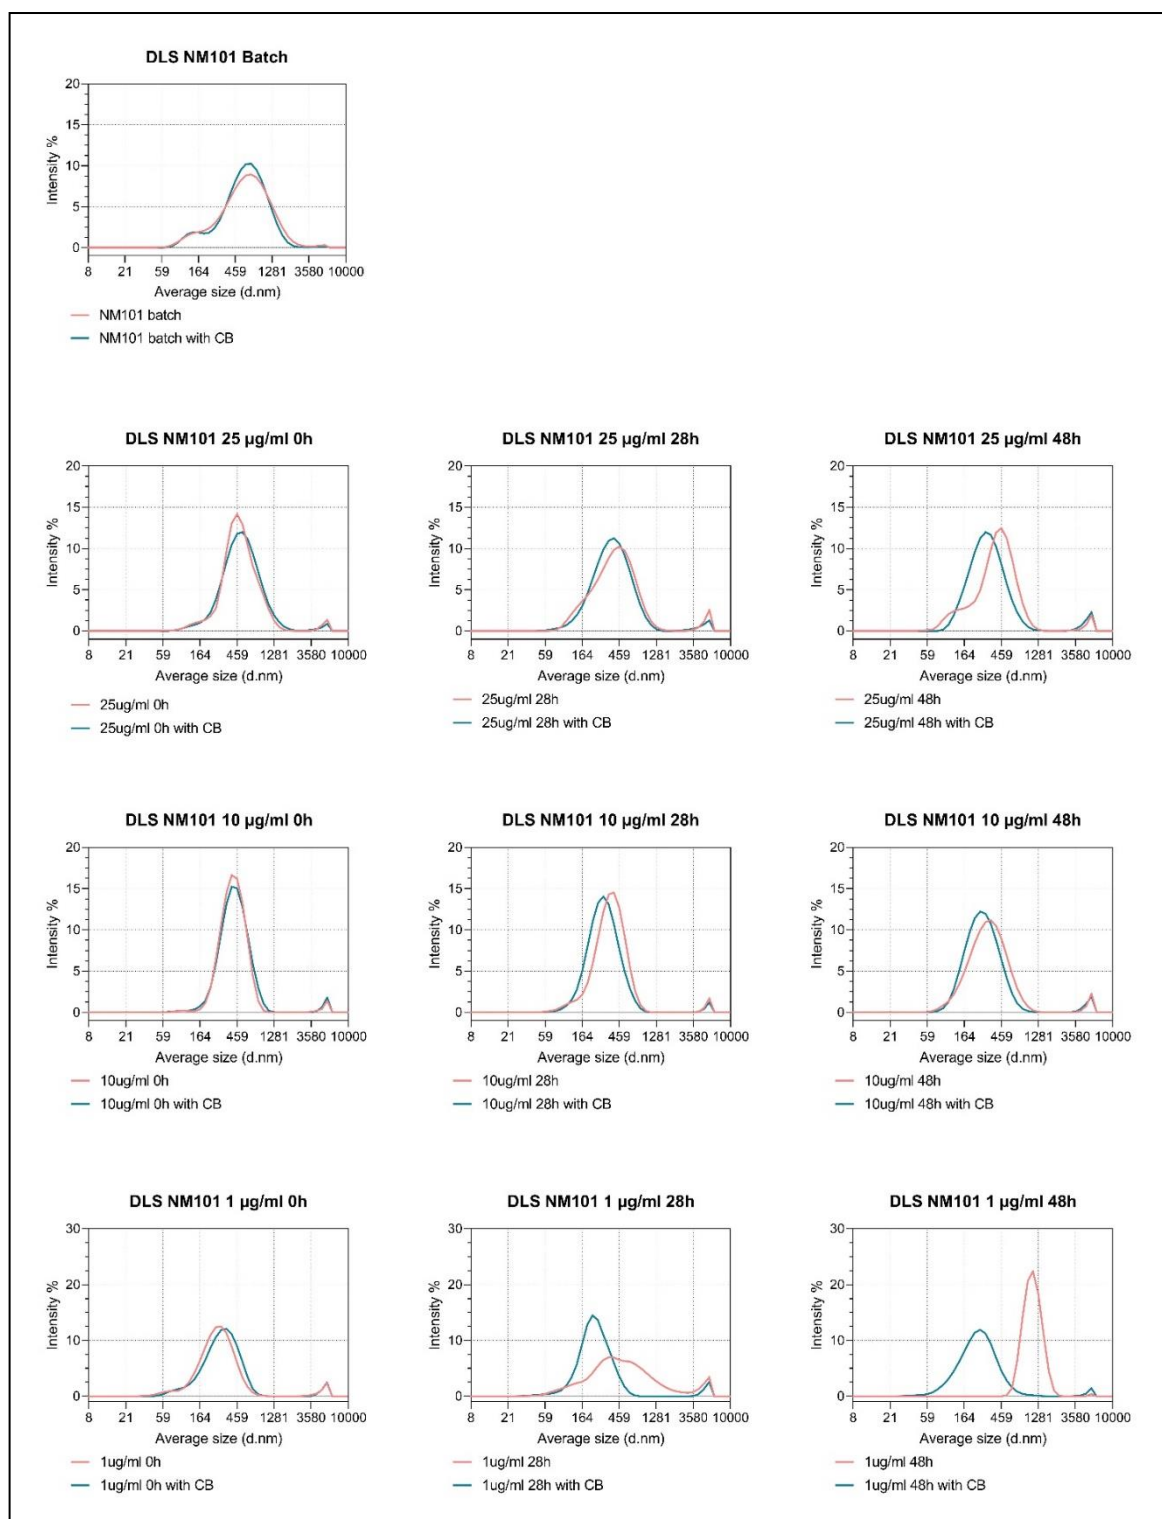

**Figure S1: Intensity-based DLS data for TiO<sub>2</sub> NM101**

Dynamic light scattering (DLS) measurement of NM after preparation in diH<sub>2</sub>O (batch), and in BEGM<sup>TM</sup> culture medium 0 h, 28 h and 48 h after preparation. NM characterisation in BEGM<sup>TM</sup> culture medium was done without and with CB (1 µg/ml).

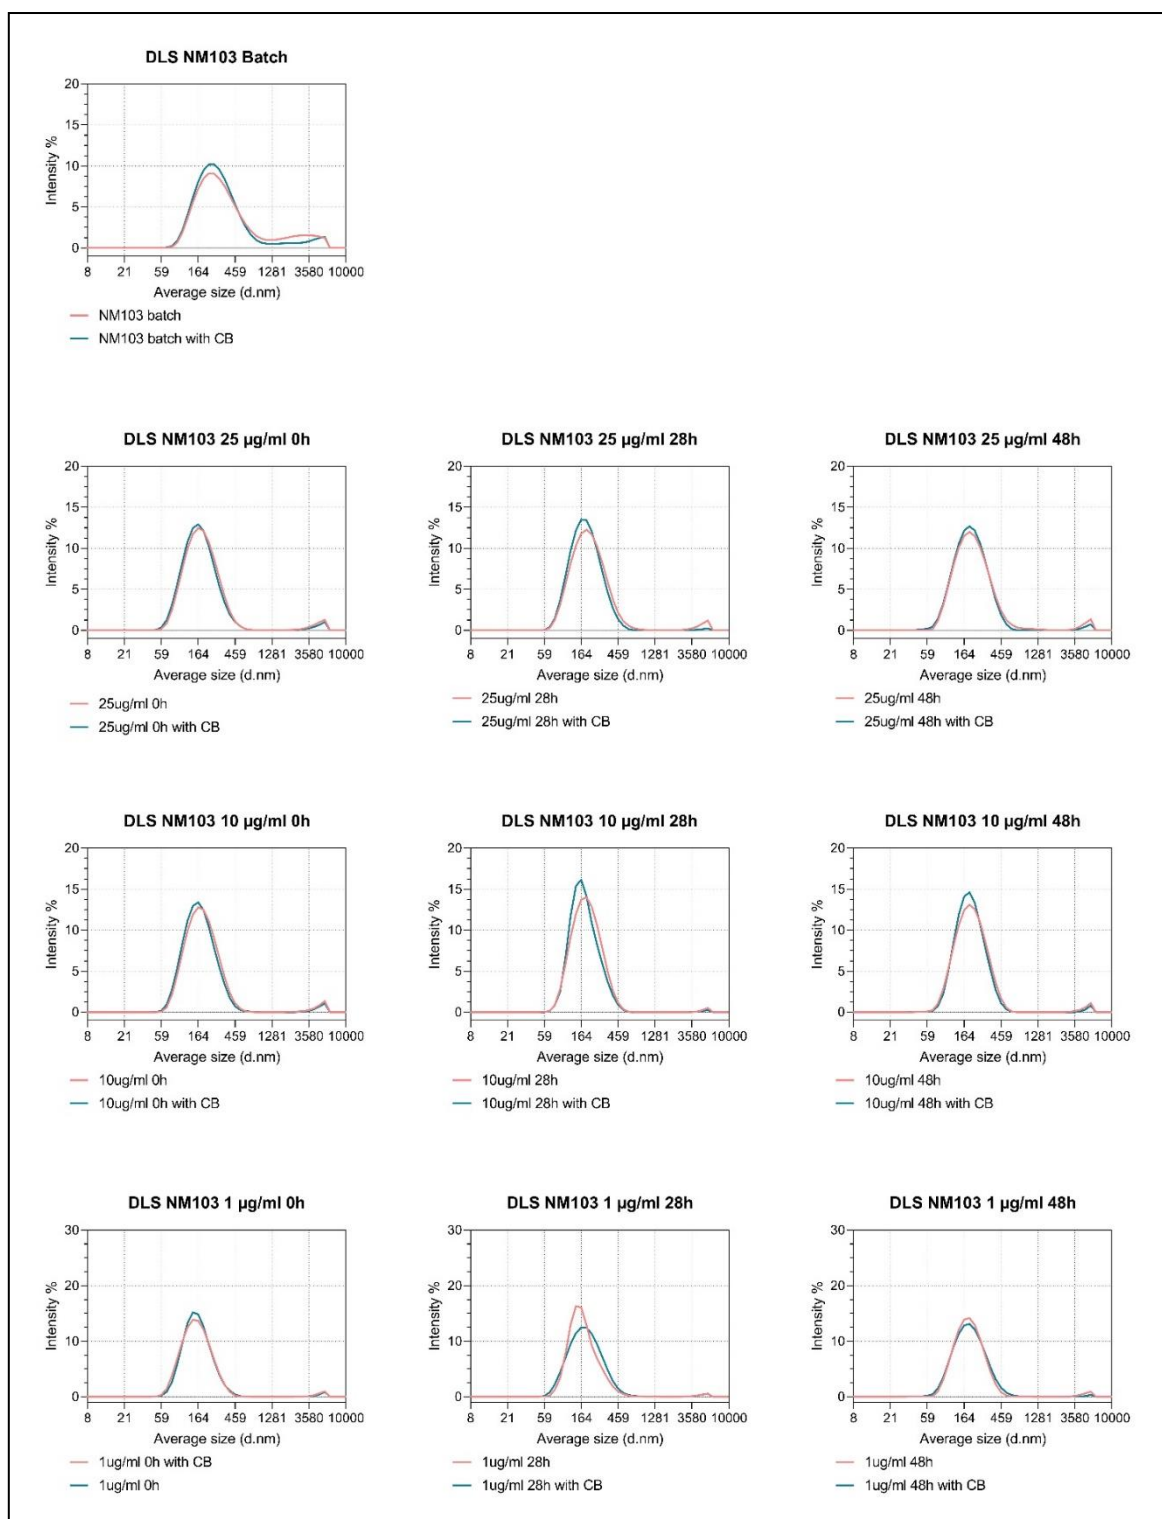

**Figure S2: Intensity-based DLS data for TiO<sub>2</sub> NM103**

Dynamic light scattering (DLS) measurement of NM after preparation in diH<sub>2</sub>O (batch), and in BEGM<sup>TM</sup> culture medium 0 h, 28 h and 48 h after preparation. NM characterisation in BEGM<sup>TM</sup> culture medium was done without and with CB (1 µg/ml).

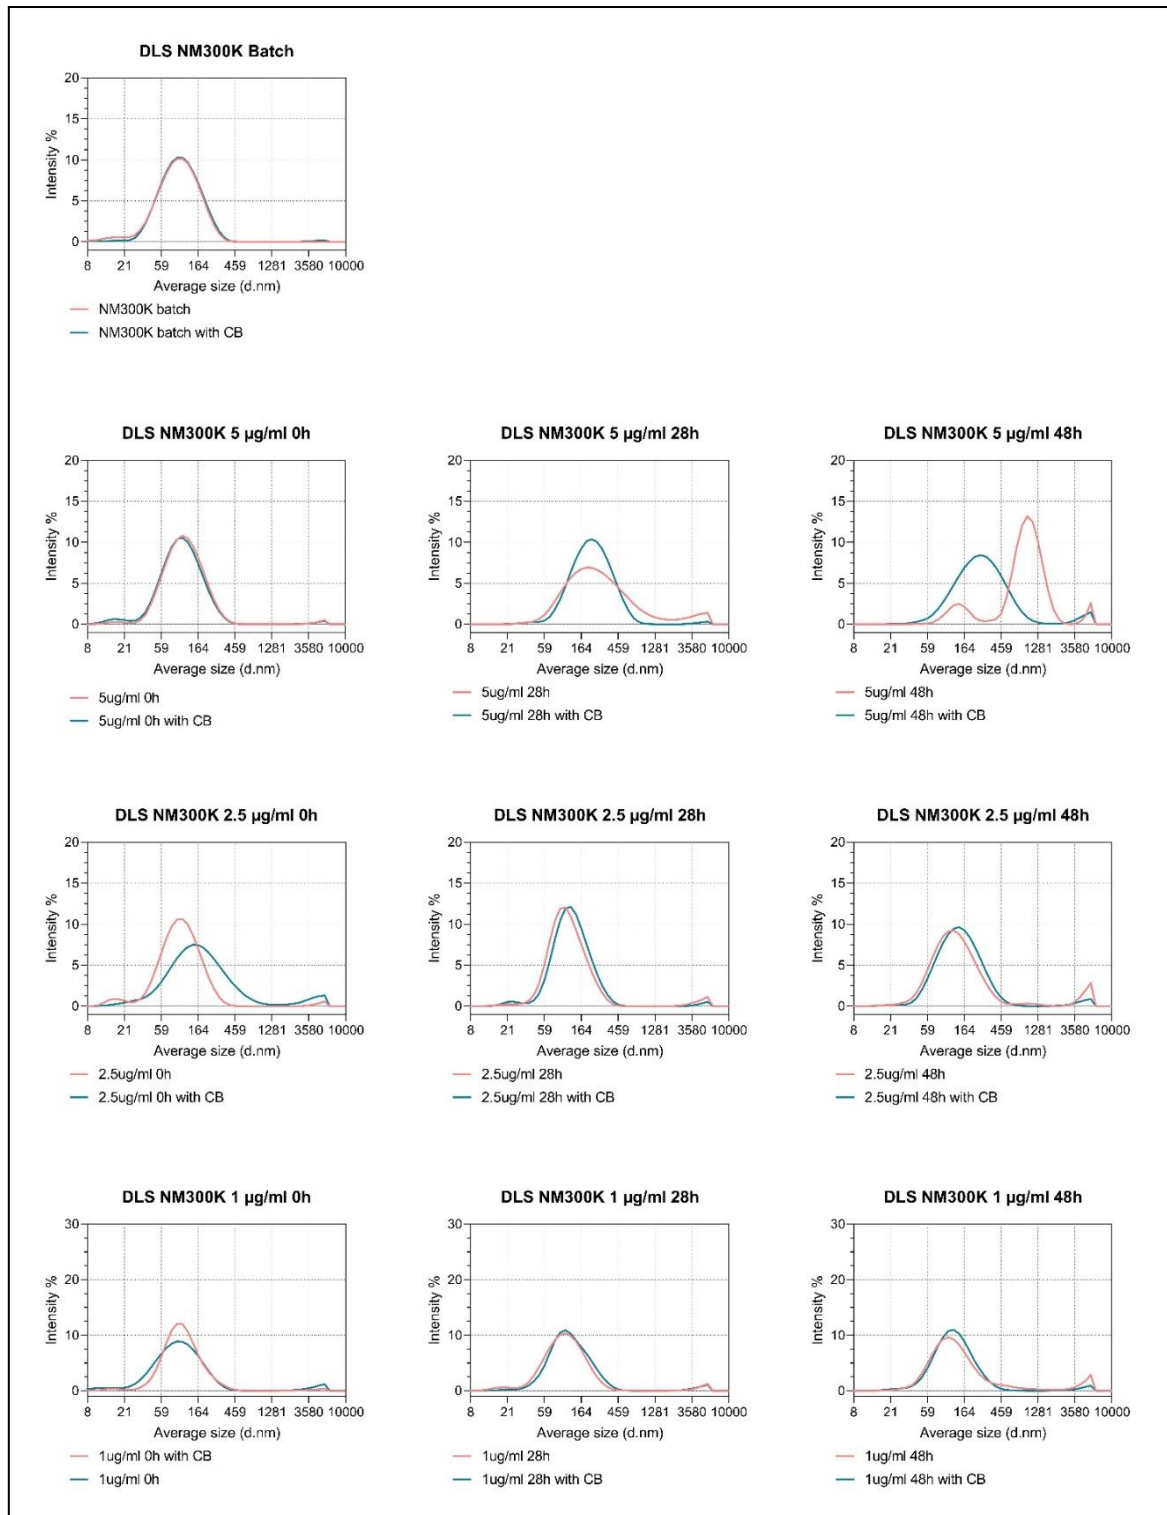

**Figure S3: Intensity-based DLS data for Ag NM300K**

Dynamic light scattering (DLS) measurement of NM after preparation in diH<sub>2</sub>O (batch), and in BEGM<sup>TM</sup> culture medium 0 h, 28 h and 48 h after preparation. NM characterisation in BEGM<sup>TM</sup> culture medium was done without and with CB (1 µg/ml).

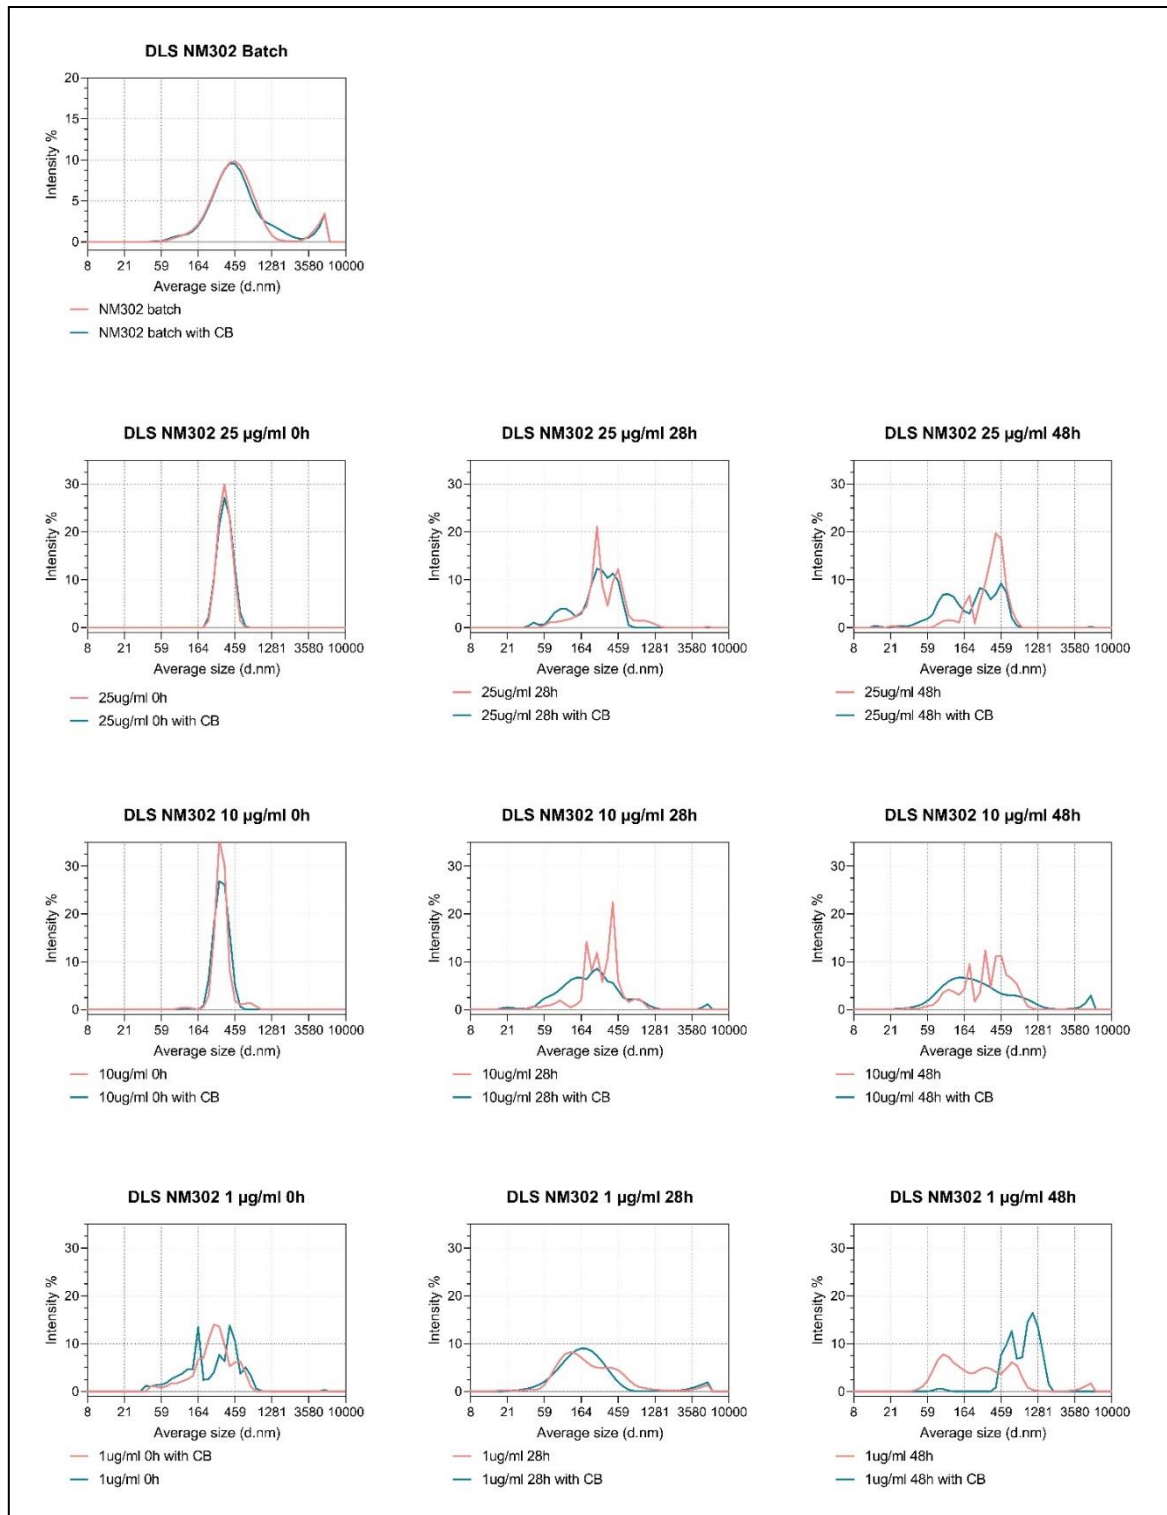

**Figure S4: Intensity-based DLS data for Ag NM302**

Dynamic light scattering (DLS) measurement of NM after preparation in diH<sub>2</sub>O (batch), and in BEGM<sup>TM</sup> culture medium 0 h, 28 h and 48 h after preparation. NM characterisation in BEGM<sup>TM</sup> culture medium was done without and with CB (1 µg/ml).

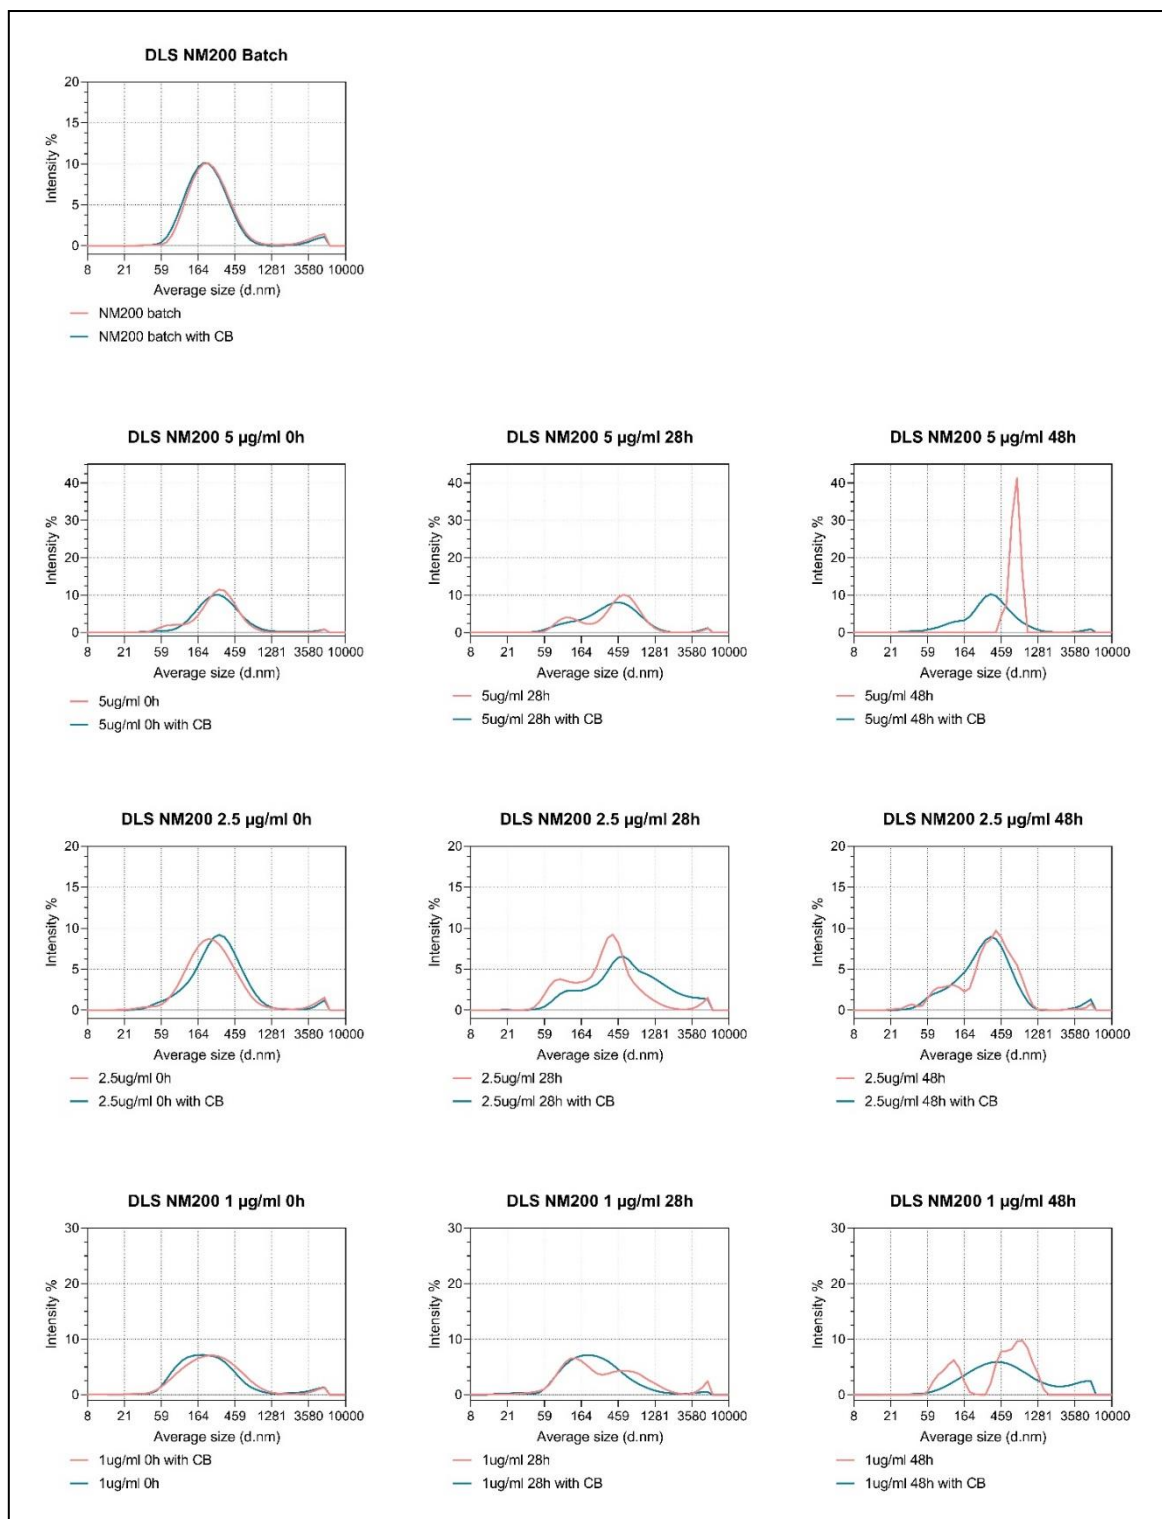

**Figure S5: Intensity-based DLS data for SiO<sub>2</sub> NM200**

Dynamic light scattering (DLS) measurement of NM after preparation in diH<sub>2</sub>O (batch), and in BEGM™ culture medium 0 h, 28 h and 48 h after preparation. NM characterisation in BEGM™ culture medium was done without and with CB (1 µg/ml).
